# Supplementary material for: Glucosamine Modified the Surface of pH-Responsive Poly(2-(diethylamino)ethyl Methacrylate) Brushes Grafted on Hollow Mesoporous Silica Nanoparticles as Smart Nanocarrier
Source: MDPI journal article supplement (doi:10.3390/polym12112749), 2020-11-20
Supplement: s1 [file s1]

## Glucosamine modified the surface of pH-responsive poly(2-(diethylamino)ethyl methacrylate) brushes grafted on hollow mesoporous silica nanoparticles as smart nanocarrier

Abeer M. Beagan,<sup>1\*</sup> Shatha S. Lahmadi,<sup>1</sup> Ahlam A. Alghamdi,<sup>1</sup> Majed A. Halwani,<sup>2</sup> Mohammed S. Almeataq,<sup>3</sup> Abdulaziz N. Alhazaa,<sup>4</sup> Khalid M. Alotaibi<sup>1</sup> and Abdullah M. Alswieleh<sup>1\*</sup>

<sup>1</sup> Department of Chemistry, College of Science, King Saud University, Riyadh, Kingdom of Saudi Arabia.

<sup>2</sup> Nanomedicine Department, King Abdullah International Medical Research Center, King Saud bin Abdulaziz University for Health Sciences, Riyadh, Saudi.

<sup>3</sup> King Abdulaziz City for Science and Technology, Riyadh, Saudi Arabia.

<sup>4</sup> Department of Physics and Astronomy, College of Science, King Saud University, Riyadh, Saudi Arabia

\* Corresponding Authors: A. Alswieleh, Email: [aswieleh@ksu.edu.sa](mailto:aswieleh@ksu.edu.sa)

A. Beagan, Email: [abeagan@ksu.edu.sa](mailto:abeagan@ksu.edu.sa)

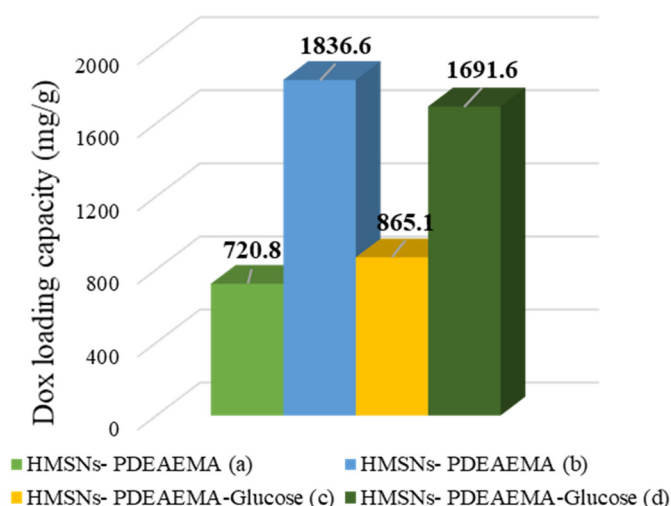

Figure S1: The dox loading capacity of HMSNs-PDEAEMA and HMSNs- PDEAEMA- glucosamine.

**Table S1:** The loading capacity and the entrapment efficiency before and after glucose modification at different concentrations of Dox. (a, c) Dox (0.5mg/ml), (b, d) Dox (1mg/ml).

| <i>Sample ID</i>            | <i>loading capacity%</i> | <i>Entrapment efficiency%</i> |
|-----------------------------|--------------------------|-------------------------------|
| HMSNs- PDEAEMA (a)          | 41.9%                    | 72.1%                         |
| HMSNs- PDEAEMA (b)          | 64.7%                    | 91.8%                         |
| HMSNs- PDEAEMA- glucose (c) | 46.4%                    | 86.5%                         |
| HMSNs- PDEAEMA- glucose (d) | 62.8%                    | 84.6%                         |

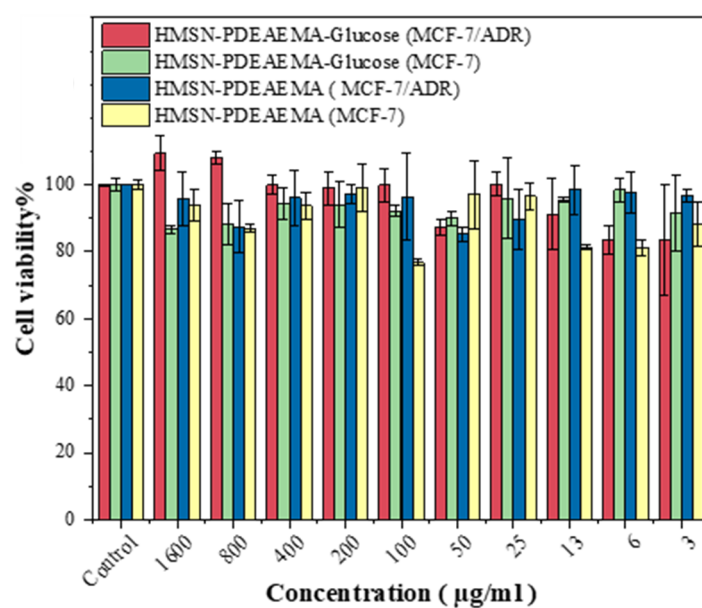

**Figure S2.** Illustration the effect of unloaded DOX hybrid nanoparticles on MCF-7 and MCF-7/ADR cells.
